# Supplementary material for: Isolation and Production of Human Monoclonal Antibody Proteins against a Toxocara canis Excretory–Secretory Recombinant Antigen
Source: MDPI journal article supplement (doi:10.3390/pathogens11111232), 2022-10-25
Supplement: s1 [file s1]

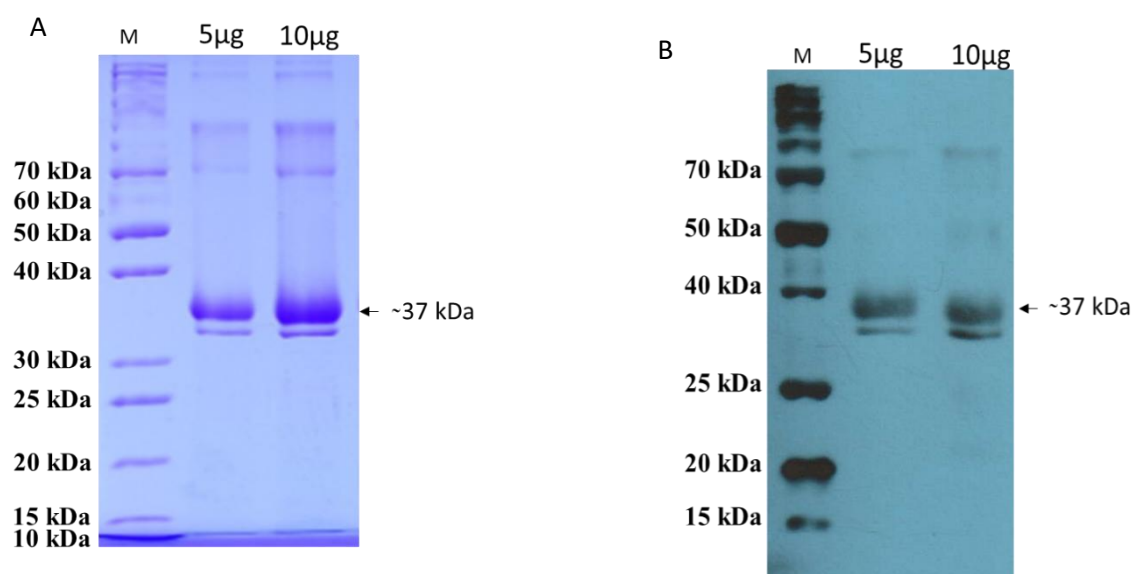

**Figure S1.** Recombinant TES-26 protein verification. (A) SDS-PAGE profile of rTES-26 protein. (B) Western blot of rTES-26 protein.

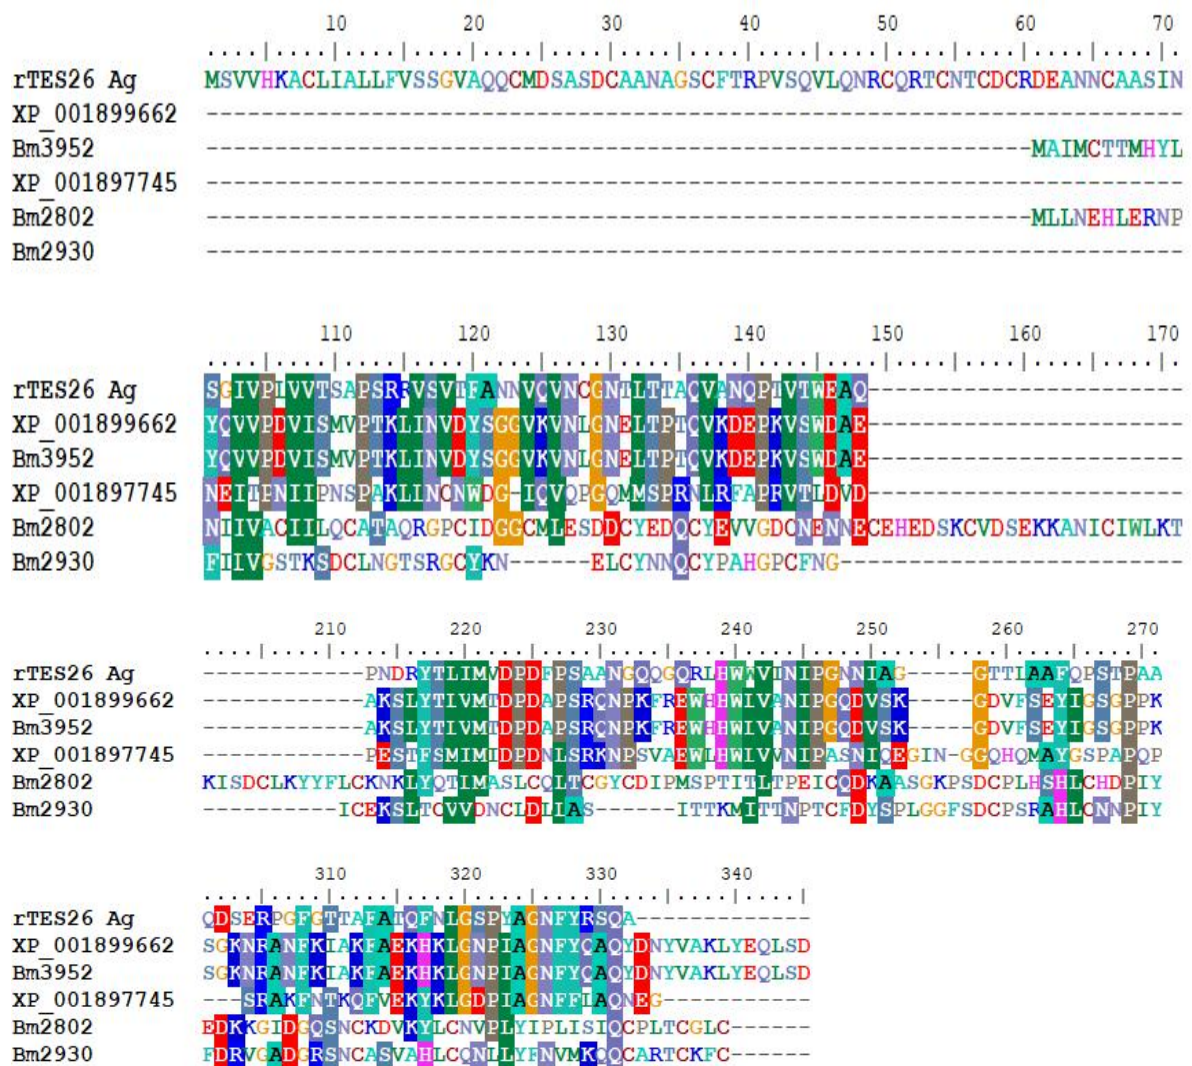

**Figure S2.** ClustalW alignment of rTES26 antigen against *B. malayi* proteins.

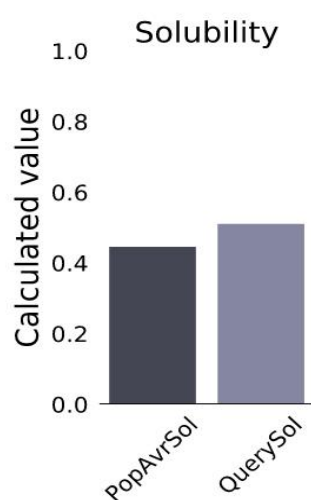

**Protein: Clone 49**

**Predicted scaled solubility:**

0.511

**pI:** 8.780

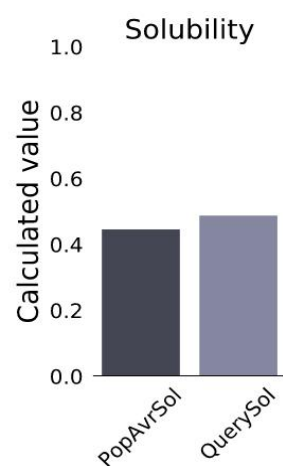

**Protein: Clone 48**

**Predicted scaled solubility:**

0.498

**pI:** 9.560

**Figure S3.** The Protein–Sol calculation for clone 49 and clone 48
